# Supplementary material for: Direct X-ray detectors made of zero-dimensional hybrid metal halide perovskite single crystals
Source: Royal Society of Chemistry journal article supplement (doi:10.1039/d4tc00594e), 2024-01-01
Supplement: d4tc00594e1.pdf [file d4tc00594e1.pdf]

Supporting information

## **Direct X-ray detection made of zero-dimensional hybrid metal halide perovskite single crystal**

*Guangya Zheng<sup>a</sup>, Haodi Wu<sup>a,b,d\*</sup>, Zhiwu Dong<sup>a</sup>, Tong Jin<sup>a</sup>, Jincong Pang<sup>a</sup>, Yujue Liu<sup>a</sup>,  
Zhiping Zheng<sup>a</sup>, Guangda Niu<sup>a,c,d</sup>, Ling Xu<sup>a,d\*</sup>, Jiang Tang<sup>a,c,d\*</sup>*

<sup>a</sup> Wuhan National Laboratory for Optoelectronics and School of Optical and Electronic Information, Huazhong University of Science and Technology, Wuhan 430074, China

<sup>b</sup> Research Center for Medical Artificial Intelligence, Shenzhen Institute of Advanced Technology, Chinese Academy of Sciences, Shenzhen, Guangdong 518055, China

<sup>c</sup> Optics Valley Laboratory, Wuhan 430074, China

<sup>d</sup> Ezhou Industrial Technology Research Institute, Huazhong University of Science and Technology, Ezhou, 436000, P.R.China

Email: whd18501@163.com; xuling@mail.hust.edu.cn; jtang@mail.hust.edu.cn

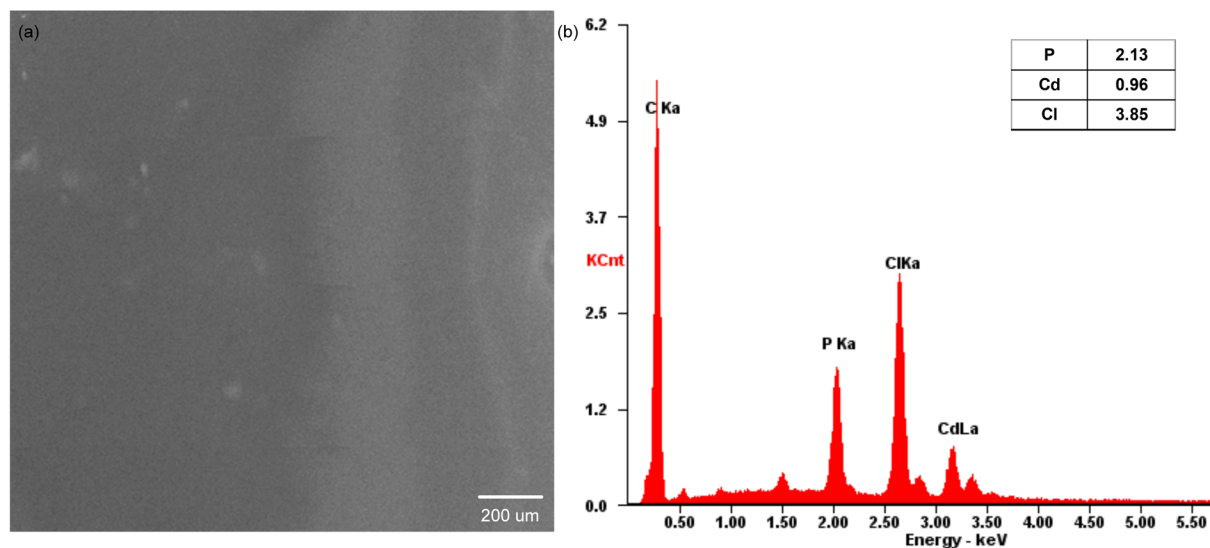

**Figure S1.** (a) SEM image of the  $(C_{19}H_{18}P)_2CdCl_4$  SC surface; (b) EDS spectra of the three elements P, Cd and Cl.

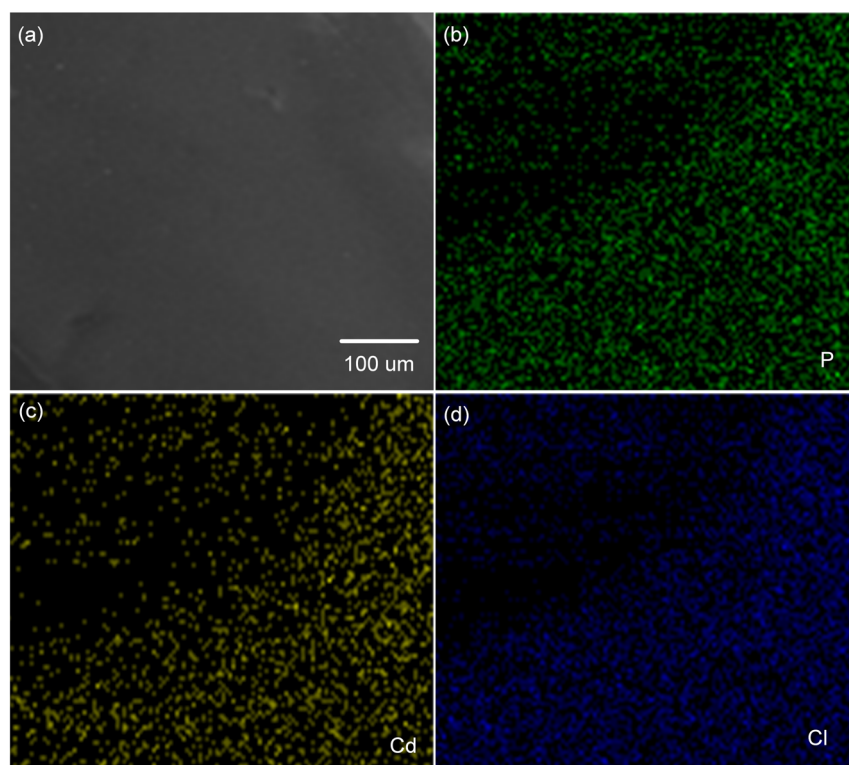

**Figure S2.** EDS mapping scanning measurement of the detected elements P, Cd and Cl.

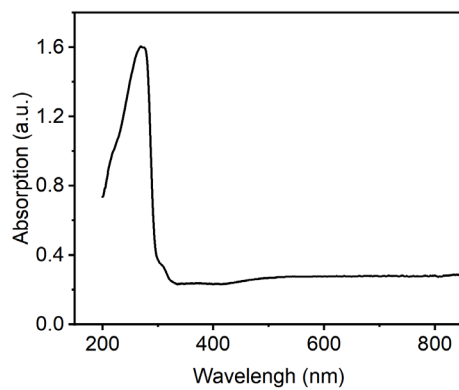

**Figure S3.** Absorption and photoluminescence spectra of the  $(C_{19}H_{18}P)_2CdCl_4$  SC.

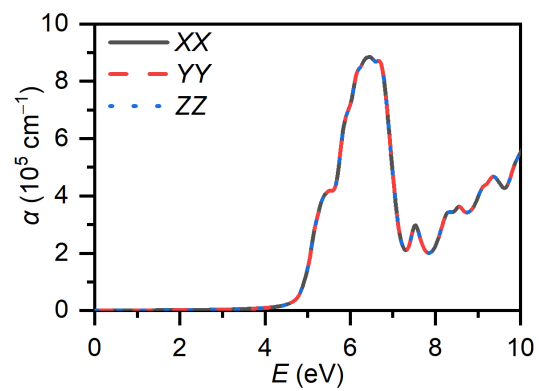

**Figure S4.** Optical absorption spectra of  $(C_{19}H_{18}P)_2CdCl_4$  calculated based on the HSE functional.

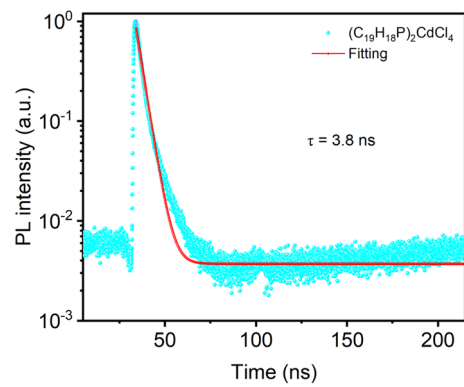

**Figure S5.** PL decay time of the  $(C_{19}H_{18}P)_2CdCl_4$  crystals.

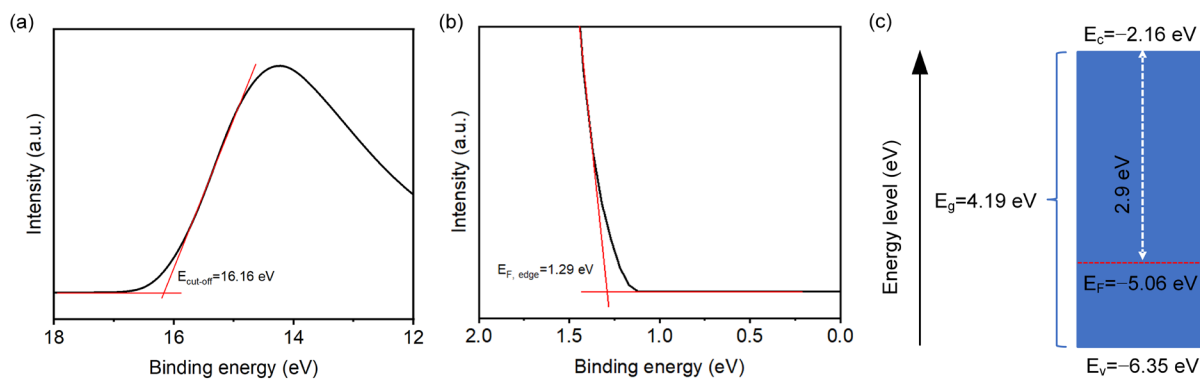

**Figure S6.** (a) UPS spectra of  $(\text{C}_{19}\text{H}_{18}\text{P})_2\text{CdCl}_4$ . (b) Energy band diagram of the  $(\text{C}_{19}\text{H}_{18}\text{P})_2\text{CdCl}_4$  calculated from the bandgap and UPS results.

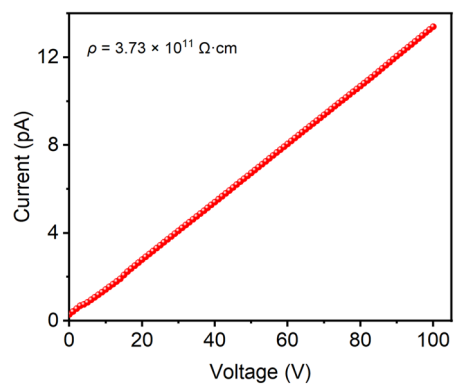

**Figure S7.** Resistivity measurement for  $(\text{C}_{19}\text{H}_{18}\text{P})_2\text{CdCl}_4$  SC.



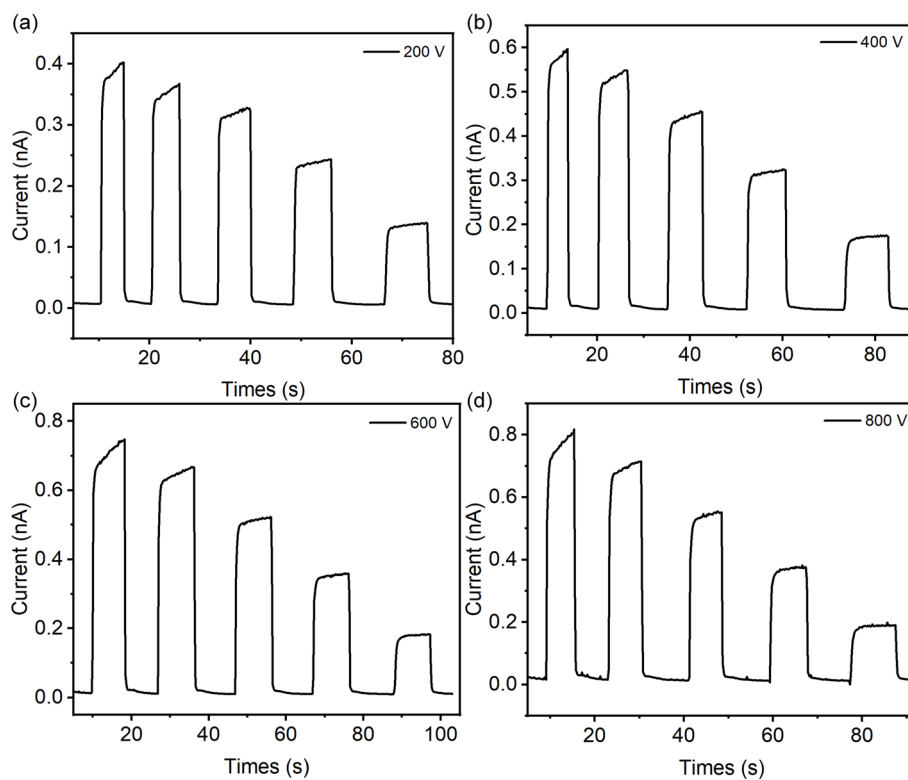

**Figure S8.** ON/OFF photocurrent response under various electric field and dose rates of the  $(C_{19}H_{18}P)_2CdCl_4$  SC X-ray detector.

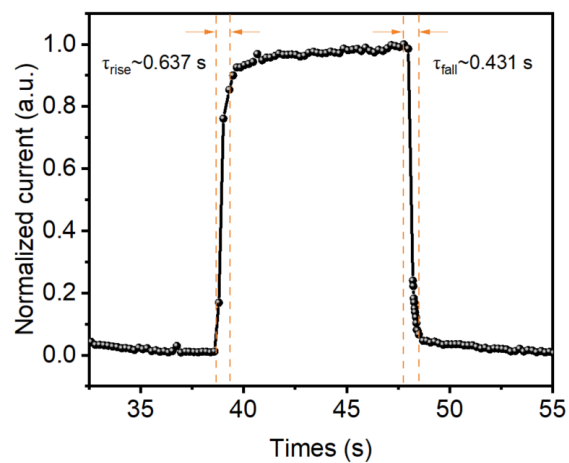

**Figure S9.** Single cycle on–off switching showing the rise and fall time. The rise and fall time of the device are defined as the time taken for the initial current to increase or decrease from initial to 90% of the on-state current, and vice versa. It is observed that the  $(\text{C}_{19}\text{H}_{18}\text{P})_2\text{CdCl}_4$  photodetector yields a rise/fall time of 0.637/0.431 s.

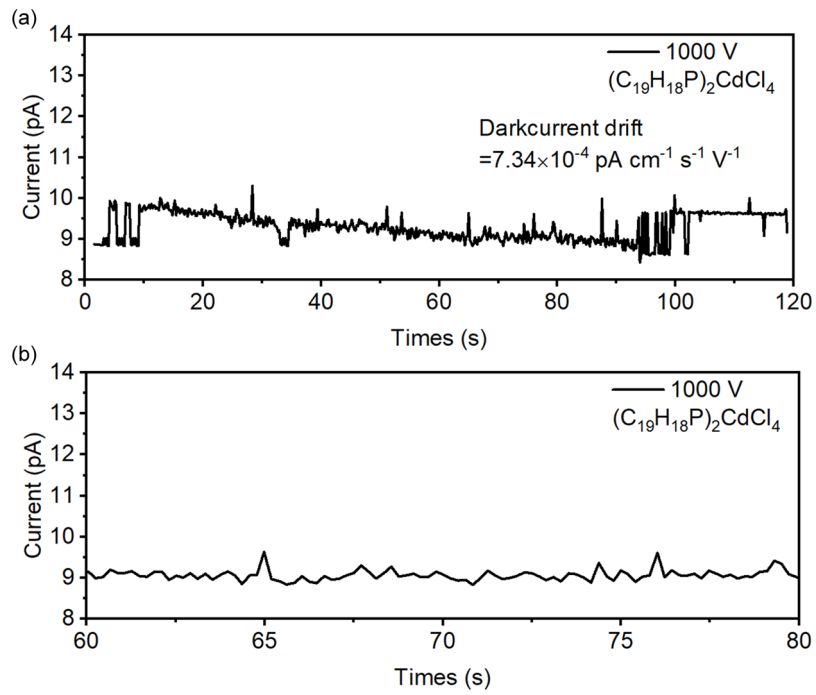

**Figure S10.** (a) Dark current drift of  $(C_{19}H_{18}P)_2CdCl_4$  SC detector under 1000 V bias voltage. (b) Fluctuation of the dark current of  $(C_{19}H_{18}P)_2CdCl_4$  device.

**Table S1.** Crystallographic information of  $(C_{19}H_{18}P)_2CdCl_4$ .

| Compound                                      | $(C_{19}H_{18}P)_2CdCl_4$                                     |
|-----------------------------------------------|---------------------------------------------------------------|
| Empirical formula                             | $C_{38}H_{36}CdCl_4P_2$                                       |
| Formula weight                                | 808.81                                                        |
| Temperature/K                                 | 149.99(10)                                                    |
| Crystal system                                | cubic                                                         |
| Space group                                   | $P2_13$                                                       |
| $a/\text{\AA}$                                | 15.49955(3)                                                   |
| $b/\text{\AA}$                                | 15.49955(3)                                                   |
| $c/\text{\AA}$                                | 15.49955(3)                                                   |
| $\alpha/^\circ$                               | 90                                                            |
| $\beta/^\circ$                                | 90                                                            |
| $\gamma/^\circ$                               | 90                                                            |
| Volume/ $\text{\AA}^3$                        | 3723.55(2)                                                    |
| $Z$                                           | 4                                                             |
| $\rho_{\text{calc}} / \text{g/cm}^3$          | 1.443                                                         |
| $\mu/\text{mm}^{-1}$                          | 8.343                                                         |
| $F(000)$                                      | 1640.0                                                        |
| Crystal size/ $\text{mm}^3$                   | $0.22 \times 0.18 \times 0.12$                                |
| Radiation                                     | Cu $K\alpha$ ( $\lambda = 1.54184$ )                          |
| $2\theta$ range for data collection/ $^\circ$ | 8.068 to 148.264                                              |
| Index ranges                                  | $-18 \leq h \leq 18, -18 \leq k \leq 19, -19 \leq l \leq 19$  |
| Reflections collected                         | 29156                                                         |
| Independent reflections                       | 2539 [ $R_{\text{int}} = 0.0459, R_{\text{sigma}} = 0.0158$ ] |
| Data/restraints/parameters                    | 2539/0/139                                                    |
| Goodness-of-fit on $F^2$                      | 1.056                                                         |
| Final $R$ indexes [ $I \geq 2\sigma(I)$ ]     | $R_1 = 0.0201, wR_2 = 0.0567$                                 |
| Final $R$ indexes [all data]                  | $R_1 = 0.0201, wR_2 = 0.0567$                                 |
| Largest diff. peak/hole / $e \text{\AA}^{-3}$ | 1.50/-0.27                                                    |

**Table S2.** Fractional Atomic Coordinates ( $\times 10^4$ ) and Equivalent Isotropic Displacement Parameters ( $\text{\AA}^2 \times 10^3$ ) of  $(\text{C}_{19}\text{H}_{18}\text{P})_2\text{CdCl}_4$ .  $U_{eq}$  is defined as 1/3 of the trace of the orthogonalised  $U_{ij}$  tensor.

| Atom | x          | y          | z          | $U_{eq}$  |
|------|------------|------------|------------|-----------|
| Cd1  | 5623.8(2)  | 5623.8(2)  | 5623.8(2)  | 21.58(12) |
| Cl1  | 5986.9(5)  | 4831.5(5)  | 6958.2(4)  | 26.82(17) |
| Cl2  | 4714.6(4)  | 4714.6(4)  | 4714.6(4)  | 28.8(3)   |
| P1   | 7831.7(4)  | 2168.3(4)  | 7168.3(4)  | 22.8(3)   |
| P2   | 4958.7(4)  | -41.3(4)   | 5041.3(4)  | 21.1(2)   |
| C14  | 4288.9(19) | -711.1(19) | 5711.1(19) | 28.9(10)  |
| C12  | 4810(2)    | 1191(2)    | 6330(2)    | 31.7(7)   |
| C4   | 6683(2)    | 854(2)     | 7570(2)    | 32.4(7)   |
| C11  | 5198(2)    | 1726(2)    | 4916(2)    | 29.7(6)   |
| C10  | 4876(3)    | 2020(2)    | 6652(2)    | 39.1(8)   |
| C5   | 8075(2)    | 402(2)     | 7039(2)    | 29.7(6)   |
| C1   | 6987(2)    | -651(2)    | 7362(2)    | 35.6(7)   |
| C13  | 4973.4(19) | 1040.3(18) | 5452.2(18) | 23.3(6)   |
| C3   | 7809(2)    | -451(2)    | 7079(2)    | 34.5(7)   |
| C2   | 6427(2)    | -4(3)      | 7608(3)    | 39.1(8)   |
| C6   | 7507.5(18) | 1059.8(19) | 7278.1(19) | 23.3(6)   |
| C8   | 5116(3)    | 2697(2)    | 6118(2)    | 37.4(8)   |
| C9   | 5277(2)    | 2548(2)    | 5256(2)    | 35.2(7)   |
| C7   | 7164.2(19) | 2835.8(19) | 7835.8(19) | 33.9(12)  |

**Table S3.** Anisotropic Displacement Parameters ( $\text{\AA}^2 \times 10^3$ ) for  $(\text{C}_{19}\text{H}_{18}\text{P})_2\text{CdCl}_4$ . The Anisotropic displacement factor exponent takes the form:  $-2\pi^2[h^2a^{*2}U_{11}+2hka^*b^*U_{12}+\dots]$ .

| Atom | $U_{11}$  | $U_{22}$  | $U_{33}$  | $U_{23}$ | $U_{13}$  | $U_{12}$ |
|------|-----------|-----------|-----------|----------|-----------|----------|
| Cd1  | 21.58(12) | 21.58(12) | 21.58(12) | -0.08(7) | -0.08(7)  | -0.08(7) |
| Cl1  | 28.3(3)   | 31.2(4)   | 21.0(3)   | 1.7(3)   | 1.3(3)    | 6.4(3)   |
| Cl2  | 28.8(3)   | 28.8(3)   | 28.8(3)   | -4.2(3)  | -4.2(3)   | -4.2(3)  |
| P1   | 22.8(3)   | 22.8(3)   | 22.8(3)   | -3.7(3)  | 3.7(3)    | 3.7(3)   |
| P2   | 21.1(2)   | 21.1(2)   | 21.1(2)   | 1.7(3)   | 1.7(3)    | -1.7(3)  |
| C14  | 28.9(10)  | 28.9(10)  | 28.9(10)  | 3.3(12)  | 3.3(12)   | -3.3(12) |
| C12  | 42.2(18)  | 31.5(16)  | 21.3(14)  | 1.8(12)  | -1.7(13)  | 2.6(14)  |
| C4   | 24.2(15)  | 36.0(17)  | 37.1(16)  | -1.5(13) | 5.9(13)   | 1.0(12)  |
| C11  | 36.5(16)  | 24.4(14)  | 28.3(15)  | 3.2(12)  | 1.3(13)   | -1.1(12) |
| C10  | 52(2)     | 40.0(18)  | 25.1(15)  | -5.2(14) | -6.9(14)  | 7.3(16)  |
| C5   | 26.5(14)  | 27.2(15)  | 35.4(16)  | 1.5(12)  | 5.2(12)   | 3.1(12)  |
| C1   | 38.6(17)  | 32.1(15)  | 36.1(17)  | 2.3(14)  | -3.4(13)  | -9.7(15) |
| C13  | 23.4(13)  | 24.3(13)  | 22.2(14)  | 1.5(11)  | -0.3(11)  | 1.4(11)  |
| C3   | 39.2(17)  | 25.8(16)  | 38.7(18)  | 2.3(13)  | 2.7(14)   | 4.3(13)  |
| C2   | 30.8(17)  | 43.2(19)  | 43.2(19)  | 1.0(16)  | 5.4(14)   | -9.7(14) |
| C6   | 23.1(13)  | 24.8(14)  | 22.0(13)  | -1.0(11) | 2.4(11)   | 2.3(11)  |
| C8   | 46(2)     | 25.1(15)  | 40.6(18)  | -7.6(14) | -14.7(16) | 4.0(14)  |
| C9   | 40.2(17)  | 23.4(14)  | 41.9(18)  | 4.0(13)  | -5.4(15)  | 0.1(13)  |
| C7   | 33.9(12)  | 33.9(12)  | 33.9(12)  | -9.2(12) | 9.2(12)   | 9.2(12)  |

**Table S4.** Bond Lengths for (C<sub>19</sub>H<sub>18</sub>P)<sub>2</sub>CdCl<sub>4</sub>.

| Atom | Atom             | Length/Å   | Atom | Atom | Length/Å |
|------|------------------|------------|------|------|----------|
| Cd1  | Cl1 <sup>1</sup> | 2.4702(7)  | C12  | C10  | 1.382(5) |
| Cd1  | Cl1 <sup>1</sup> | 2.4703(7)  | C12  | C13  | 1.404(4) |
| Cd1  | Cl1 <sup>2</sup> | 2.4702(7)  | C4   | C2   | 1.389(5) |
| Cd1  | Cl2              | 2.4410(12) | C4   | C6   | 1.393(4) |
| P1   | C6               | 1.798(3)   | C11  | C13  | 1.393(4) |
| P1   | C6 <sup>3</sup>  | 1.798(3)   | C11  | C9   | 1.385(4) |
| P1   | C6 <sup>4</sup>  | 1.798(3)   | C10  | C8   | 1.387(5) |
| P1   | C7               | 1.792(5)   | C5   | C3   | 1.387(4) |
| P2   | C14              | 1.798(5)   | C5   | C6   | 1.396(4) |
| P2   | C13 <sup>5</sup> | 1.793(3)   | C1   | C3   | 1.383(5) |
| P2   | C13 <sup>6</sup> | 1.793(3)   | C1   | C2   | 1.380(5) |
| P2   | C13              | 1.793(3)   | C8   | C9   | 1.378(5) |

<sup>1</sup>+Y, +Z, +X; <sup>2</sup>+Z, +X, +Y; <sup>3</sup>1-Y, -1/2+Z, 3/2-X; <sup>4</sup>3/2-Z, 1-X, 1/2+Y; <sup>5</sup>1-Z, -1/2+X, 1/2-Y; <sup>6</sup>1/2+Y,  
1/2-Z, 1-X

**Table S5.** Bond Angles for (C<sub>19</sub>H<sub>18</sub>P)<sub>2</sub>CdCl<sub>4</sub>.

| Atom             | Atom | Atom             | Angle/°     | Atom             | Atom | Atom | Angle/°    |
|------------------|------|------------------|-------------|------------------|------|------|------------|
| C11 <sup>1</sup> | Cd1  | C11              | 109.801(18) | C13 <sup>5</sup> | P2   | C13  | 108.95(10) |
| C11 <sup>2</sup> | Cd1  | C11              | 109.798(18) | C10              | C12  | C13  | 119.4(3)   |
| C11 <sup>2</sup> | Cd1  | C11 <sup>1</sup> | 109.799(18) | C2               | C4   | C6   | 119.6(3)   |
| C12              | Cd1  | C11 <sup>2</sup> | 109.142(18) | C9               | C11  | C13  | 119.8(3)   |
| C12              | Cd1  | C11              | 109.141(18) | C12              | C10  | C8   | 120.6(3)   |
| C12              | Cd1  | C11 <sup>1</sup> | 109.142(18) | C3               | C5   | C6   | 119.8(3)   |
| C6               | P1   | C6 <sup>3</sup>  | 109.33(10)  | C2               | C1   | C3   | 120.3(3)   |
| C6 <sup>4</sup>  | P1   | C6 <sup>3</sup>  | 109.33(10)  | C12              | C13  | P2   | 119.8(2)   |
| C6               | P1   | C6 <sup>4</sup>  | 109.33(10)  | C11              | C13  | P2   | 120.3(2)   |
| C7               | P1   | C6 <sup>3</sup>  | 109.61(10)  | C11              | C13  | C12  | 119.8(3)   |
| C7               | P1   | C6               | 109.62(10)  | C1               | C3   | C5   | 120.1(3)   |
| C7               | P1   | C6 <sup>4</sup>  | 109.61(10)  | C1               | C2   | C4   | 120.3(3)   |
| C13 <sup>5</sup> | P2   | C14              | 109.99(10)  | C4               | C6   | P1   | 120.4(2)   |
| C13              | P2   | C14              | 109.99(10)  | C4               | C6   | C5   | 119.8(3)   |
| C13 <sup>6</sup> | P2   | C14              | 109.99(10)  | C5               | C6   | P1   | 119.8(2)   |
| C13 <sup>5</sup> | P2   | C13 <sup>6</sup> | 108.95(10)  | C9               | C8   | C10  | 120.0(3)   |
| C13 <sup>6</sup> | P2   | C13              | 108.94(10)  | C8               | C9   | C11  | 120.5(3)   |

<sup>1</sup>+Y, +Z, +X; <sup>2</sup>+Z, +X, +Y; <sup>3</sup>1-Y, -1/2+Z, 3/2-X; <sup>4</sup>3/2-Z, 1-X, 1/2+Y; <sup>5</sup>1-Z, -1/2+X, 1/2-Y; <sup>6</sup>1/2+Y,  
1/2-Z, 1-X



**Table S6.** Torsion Angles for (C<sub>19</sub>H<sub>18</sub>P)<sub>2</sub>CdCl<sub>4</sub>.

| A                | B   | C   | D   | Angle/°   | A               | B   | C   | D   | Angle/°   |
|------------------|-----|-----|-----|-----------|-----------------|-----|-----|-----|-----------|
| C14              | P2  | C13 | C12 | 25.1(3)   | C3              | C1  | C2  | C4  | 0.3(5)    |
| C14              | P2  | C13 | C11 | -158.8(2) | C2              | C4  | C6  | P1  | 176.6(3)  |
| C12              | C10 | C8  | C9  | 1.2(6)    | C2              | C4  | C6  | C5  | -1.0(5)   |
| C10              | C12 | C13 | P2  | 176.0(3)  | C2              | C1  | C3  | C5  | -0.2(5)   |
| C10              | C12 | C13 | C11 | -0.1(5)   | C6 <sup>3</sup> | P1  | C6  | C4  | -98.5(3)  |
| C10              | C8  | C9  | C11 | 0.1(6)    | C6 <sup>4</sup> | P1  | C6  | C4  | 141.9(3)  |
| C13 <sup>1</sup> | P2  | C13 | C12 | 145.8(3)  | C6 <sup>3</sup> | P1  | C6  | C5  | 79.1(2)   |
| C13 <sup>2</sup> | P2  | C13 | C12 | -95.5(3)  | C6 <sup>4</sup> | P1  | C6  | C5  | -40.5(3)  |
| C13 <sup>2</sup> | P2  | C13 | C11 | 80.6(2)   | C6              | C4  | C2  | C1  | 0.3(5)    |
| C13 <sup>1</sup> | P2  | C13 | C11 | -38.2(3)  | C6              | C5  | C3  | C1  | -0.5(5)   |
| C13              | C12 | C10 | C8  | -1.2(6)   | C9              | C11 | C13 | P2  | -174.7(3) |
| C13              | C11 | C9  | C8  | -1.4(5)   | C9              | C11 | C13 | C12 | 1.4(5)    |
| C3               | C5  | C6  | P1  | -176.5(3) | C7              | P1  | C6  | C4  | 21.7(3)   |
| C3               | C5  | C6  | C4  | 1.1(5)    | C7              | P1  | C6  | C5  | -160.7(2) |

<sup>1</sup>1-Z, -1/2+X, 1/2-Y; <sup>2</sup>1/2+Y, 1/2-Z, 1-X; <sup>3</sup>3/2-Z, 1-X, 1/2+Y; <sup>4</sup>1-Y, -1/2+Z, 3/2-X

**Table S7.** Hydrogen Atom Coordinates ( $\text{\AA}\times 10^4$ ) and Isotropic Displacement Parameters ( $\text{\AA}^2\times 10^3$ ) for  $(\text{C}_{19}\text{H}_{18}\text{P})_2\text{CdCl}_4$ .

| Atom | x       | y        | z       | U(eq) |
|------|---------|----------|---------|-------|
| H14A | 4524.97 | -732.45  | 6283.3  | 43    |
| H14B | 4267.55 | -1283.3  | 5475.03 | 43    |
| H14C | 3716.7  | -475.04  | 5732.45 | 43    |
| H12  | 4658.65 | 737.03   | 6692.46 | 38    |
| H4   | 6305.27 | 1289.06  | 7738.87 | 39    |
| H11  | 5294.37 | 1631.71  | 4331.37 | 36    |
| H10  | 4758.17 | 2124.86  | 7230.97 | 47    |
| H5   | 8629.39 | 536.04   | 6852.94 | 36    |
| H1   | 6809.95 | -1224.26 | 7385.84 | 43    |
| H3   | 8184.13 | -890     | 6915.65 | 41    |
| H2   | 5875.6  | -142.92  | 7799.38 | 47    |
| H8   | 5169.17 | 3251.63  | 6341.98 | 45    |
| H9   | 5438.79 | 3003.25  | 4900.6  | 42    |
| H7A  | 6596.88 | 2872.12  | 7589.87 | 51    |
| H7B  | 7410.12 | 3403.12  | 7872.12 | 51    |
| H7C  | 7127.88 | 2589.88  | 8403.12 | 51    |

**Table S8.** Comparison of physical properties of  $(C_{19}H_{18}P)_2CdCl_4$  and some related materials.

| Materials                                         | Dark current density (nA cm <sup>-2</sup> ) | Electric field (V mm <sup>-1</sup> ) | Dark current drift (pA cm <sup>-1</sup> s <sup>-1</sup> V <sup>-1</sup> ) | $\mu\tau$ product (cm <sup>2</sup> V <sup>-1</sup> ) | Sensitivity ( $\mu$ C Gy <sub>air-1</sub> cm <sup>-2</sup> ) | Ref.      |
|---------------------------------------------------|---------------------------------------------|--------------------------------------|---------------------------------------------------------------------------|------------------------------------------------------|--------------------------------------------------------------|-----------|
| MA <sub>3</sub> Bi <sub>2</sub> I <sub>9</sub> SC | ~16                                         | 60                                   | $5.0 \times 10^{-7}$                                                      | $2.87 \times 10^{-3}$                                | 1947                                                         | 1         |
| Cs <sub>3</sub> Bi <sub>2</sub> I <sub>9</sub> SC | ~18                                         | 50                                   | -                                                                         | $7.97 \times 10^{-4}$                                | 1652.3                                                       | 2         |
| CsPbBr <sub>3</sub> SC                            | ~170                                        | 20                                   | -                                                                         | $\sim 2.5 \times 10^{-3}$                            | 1256                                                         | 3, 4      |
| a-Se                                              | ~0.5                                        | 10000                                | -                                                                         | $\sim 10^{-7}$                                       | 20                                                           | 5, 6, 7   |
| Rb <sub>3</sub> Bi <sub>2</sub> I <sub>9</sub> SC | 2.73                                        | 300                                  | $1.82 \times 10^{-4}$                                                     | $2.51 \times 10^{-3}$                                | 159.7                                                        | 8         |
| MAPbBr <sub>3</sub> SC                            | -                                           | 454.5                                | $4.9 \times 10^{-3}$                                                      | $1.4 \times 10^{-2}$                                 | -                                                            | 1         |
| Cs <sub>2</sub> AgBiBr <sub>6</sub> SC            | 0.15                                        | 25                                   | -                                                                         | -                                                    | 105                                                          | 9         |
| TMCM-CdCl <sub>3</sub> SC                         | -                                           | 10                                   | -                                                                         | $1.42 \times 10^{-4}$                                | 128.9                                                        | 10        |
| CdZnTe                                            | -                                           | -                                    | -                                                                         | $9.1 \times 10^{-3}$                                 | -                                                            | 11        |
| $(C_{19}H_{18}P)_2CdCl_4$ SC                      | ~20                                         | 333                                  | $7.34 \times 10^{-4}$                                                     | $8.53 \times 10^{-4}$                                | ~143.6                                                       | This work |

- 1 Y. Liu, Z. Xu, Z. Yang, Y. Zhang, J. Cui, Y. He, H. Ye, K. Zhao, H. Sun, R. Lu, M. Liu, M. G. Kanatzidis, S. Liu, *Matter*, 2020, **3**, 180–196.
- 2 Y. Zhang, Y. Liu, Z. Xu, H. Ye, Z. Yang, J. You, M. Liu, Y. He, M. G. Kanatzidis S. Liu, *Nat. Commun.*, 2020, **11**, 2304.
- 3 H. Zhang, F. Wang, Y. Lu, Q. Sun, Y. Xu, B. Zhang, W. Jie, M. G. Kanatzidis, *J. Mater. Chem. C*, 2020, **8**, 1248–1256.
- 4 Z. Shuang, H. Zhou, D. Wu, X. Zhang, B. Xiao, G. Ma, J. Zhang, H. Wang, *Chem. Eng. J*, 2022, **433**, 134544.
- 5 S. Kasap *J. Phys. D: Appl. Phys.*, 2000, **33**, 2853–2865.
- 6 D. Wu, Y. Xu, Hai Zhou, X. Feng, J. Zhang, X. Pan, Z. Gao, R. Wang, G. Ma, L. Tao, H. Wang, J. Duan, H. Wan, J. Zhang, L. Shen, H. Wang, T. Zhai, *InfoMat*, 2022, **4**, e12320.
- 7 Z. Gao, H. Zhou, K. Dong, C. Wang, J. Wei, Z. Li, J. Li, Y. Liu, J. Zhao, G. Fang, *Nano-Micro Lett.*, 2022, **14**, 215.
- 8 M. Xia, J. Yuan, G. Niu, X. Du, L. Yin, W. Pan, J. Luo, Z. Li, H. Zhao, K. Xue, X. Miao, J. Tang, *Adv. Funct. Mater.*, 2020, **30**, 1910648.
- 9 W. Pan, H. Wu, J. Luo, Z. Deng, C. Ge, C. Chen, X. Jiang, W. J. Yin, G. Niu, L. Zhu, L. Yin, Y. Zhou, Q. Xie, X. Ke, M. Sui, J. Tang, *Nat. Photon.*, 2017, **11**, 726–732
- 10 C. Ma, F. Chen, X. Song, M. Chen, L. Gao, P. Wang, J. Wen, Z. Yang, Y. Tang, K. Zhao, S. Liu, *Adv. Funct. Mater.*, 2021, **31**, 2100691..
- 11 K. Kim, S. Kim, J. Hong, J. Lee, T. Hong, A. E. Bolotnikov, G. S. Camarda, R. B. James, *J. Appl. Phys.* 2015, **117**, 145702.
